# Supplementary material for: Phosphate-crosslinked β-cyclodextrin polymer for highly efficient removal of Pb(ii) from acidic wastewater
Source: Royal Society of Chemistry journal article supplement (doi:10.1039/d1nj05925d), 2022-01-01
Supplement: d1nj05925d1.pdf [file d1nj05925d1.pdf]

*New Journal of Chemistry*

## Electronic Supplementary Information

### **Phosphate-crosslinked $\beta$ -cyclodextrin polymer for highly efficient removal of Pb(II) from acidic wastewater**

**Junhua Sun<sup>a</sup>, Xiuxian Zhao<sup>b</sup>, Guoxin Sun<sup>a,b</sup>, Heng Zhao<sup>a</sup>, Liangguo Yan<sup>c</sup>, Xuchuan Jiang<sup>b,\*</sup>, Yu Cui<sup>a,\*</sup>**

<sup>a</sup> School of Chemistry and Chemical Engineering, University of Jinan, No. 336 Nanxinhuang West Road, 250022, Jinan, PR China<sup>1</sup>

<sup>b</sup> Institute for Smart Materials & Engineering, University of Jinan, No. 336 Nanxinhuang West Road, 250022, Jinan, PR China

<sup>c</sup> School of Water Conservancy and Environment, University of Jinan, No. 336 Nanxinhuang West Road, 250022, Jinan, PR China

\* **Corresponding author:** E-mail: [chm\\_cuiy@ujn.edu.cn](mailto:chm_cuiy@ujn.edu.cn) (Y. Cui), [ism\\_jiangxc@ujn.edu.cn](mailto:ism_jiangxc@ujn.edu.cn) (X.C. Jiang)

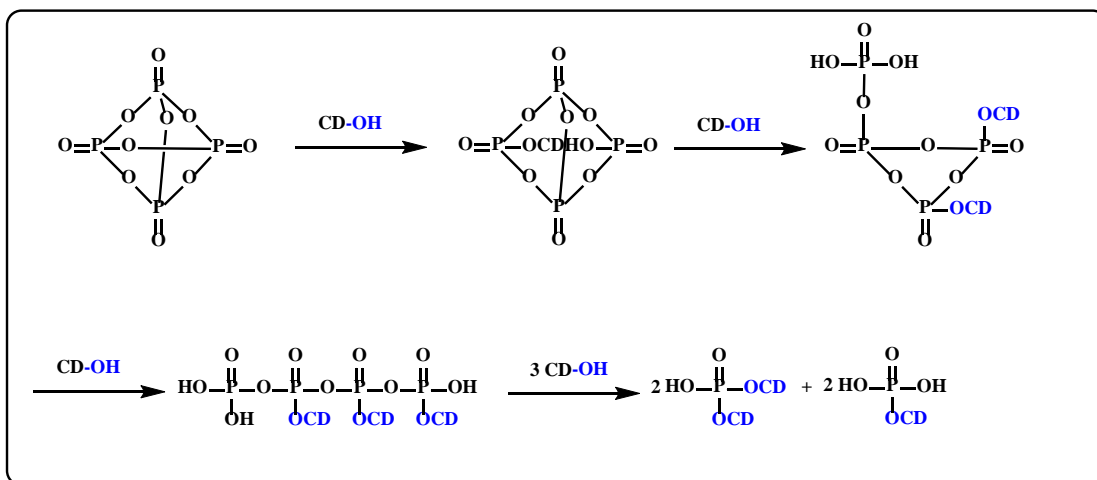

Fig. S1 The synthesis mechanism diagram of  $\beta$ -CDPP.

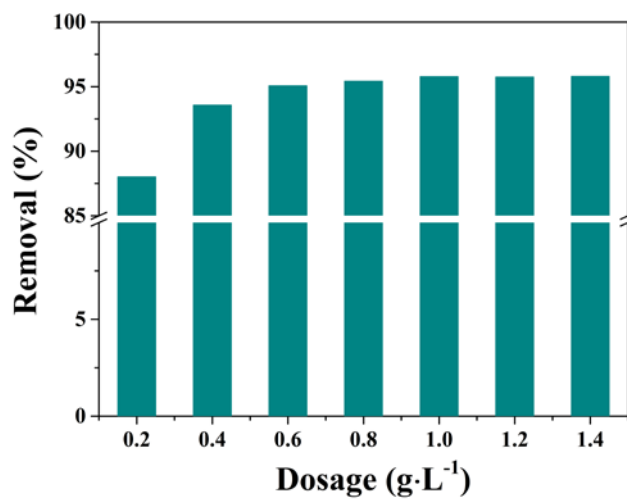

Fig. S2 Effect of adsorbent dosage on the removal ratio of  $\text{Pb(II)}$  ( $\text{Pb(II)}=100 \text{ mg}\cdot\text{L}^{-1}$ ,  $\text{pH}=3$ ,  $25^\circ\text{C}$ ).

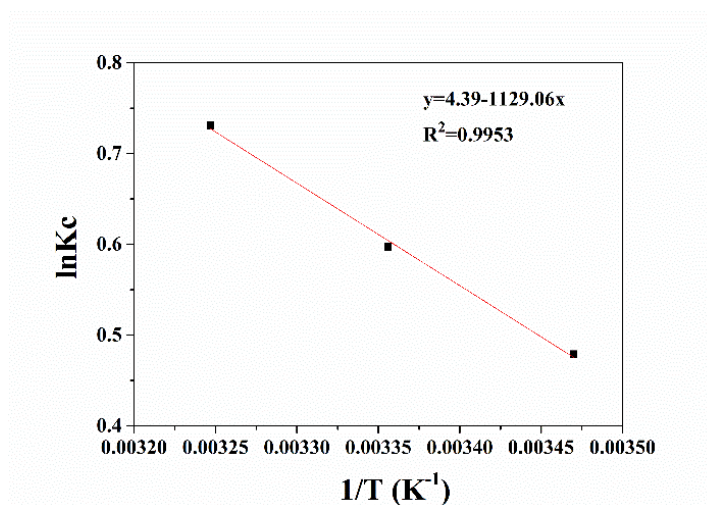

Fig. S3 Fitting plot between  $1/T$  and  $\ln Kc$ .

**Table S1.** The amount of solid product under different feeding ratios ( $\beta$ -CD=2 g).

| $\beta$ -CD:P <sub>2</sub> O <sub>5</sub> (molar ratio) | 1:5 | 1:6  | 1:8  | 1:10 | 1:12 | 1:14 | 1:20 |
|---------------------------------------------------------|-----|------|------|------|------|------|------|
| Solid product (g)                                       | 0   | 0.02 | 1.19 | 2.50 | 1.88 | 1.46 | 0    |

**Table S2.** Related parameters from kinetics equation.

| Metal ion        | C <sub>0</sub> (ppm) | Q <sub>exp</sub> (mg·g <sup>-1</sup> ) | Pseudo-first-order model            |                                        |                | Pseudo-second-order model                               |                                        |                |
|------------------|----------------------|----------------------------------------|-------------------------------------|----------------------------------------|----------------|---------------------------------------------------------|----------------------------------------|----------------|
|                  |                      |                                        | K <sub>1</sub> (min <sup>-1</sup> ) | Q <sub>cal</sub> (mg·g <sup>-1</sup> ) | R <sup>2</sup> | K <sub>2</sub> (g·mg <sup>-1</sup> ·min <sup>-1</sup> ) | Q <sub>cal</sub> (mg·g <sup>-1</sup> ) | R <sup>2</sup> |
| Pb <sup>2+</sup> | 100                  | 95.0                                   | 0.3842                              | 90.0                                   | 0.9108         | 0.0054                                                  | 101.5                                  | 0.9887         |

**Table S3.** Parameters of non-linear Langmuir, Freundlich, Redlich-Peterson and Sips isotherm models fitting for Pb(II) adsorption at 15 °C, 25 °C, 35 °C.

| Isotherm model   | Parameters                             | Temperature |         |          |
|------------------|----------------------------------------|-------------|---------|----------|
|                  |                                        | 15 °C       | 25 °C   | 35 °C    |
| Langmuir         | R <sup>2</sup>                         | 0.9831      | 0.9715  | 0.9680   |
|                  | K <sub>L</sub> (L·mg <sup>-1</sup> )   | 0.0192      | 0.0285  | 0.0587   |
|                  | q <sub>max</sub> (mg·g <sup>-1</sup> ) | 602.11      | 602.02  | 578.29   |
| Freundlich       | R <sup>2</sup>                         | 0.8895      | 0.8837  | 0.8620   |
|                  | K <sub>F</sub> (mg·g <sup>-1</sup> )   | 64.1136     | 89.4064 | 128.8998 |
|                  | n                                      | 2.6635      | 3.0356  | 3.6550   |
| Redlich-Peterson | R <sup>2</sup>                         | 0.9920      | 0.9765  | 0.9634   |
|                  | a <sub>R</sub> (mg <sup>-1</sup> )     | 0.0035      | 0.0071  | 0.0399   |
|                  | K <sub>R</sub> (L·g <sup>-1</sup> )    | 8.5496      | 12.7052 | 30.1098  |
|                  | $\beta$                                | 1.2409      | 1.1937  | 1.0494   |
| Sips             | R <sup>2</sup>                         | 0.9861      | 0.9675  | 0.9623   |
|                  | $\beta_s$                              | 1.2144      | 1.1290  | 1.0780   |
|                  | K <sub>S</sub> (L·mg <sup>-1</sup> )   | 0.0101      | 0.0197  | 0.0490   |
|                  | q <sub>ms</sub> (mg·g <sup>-1</sup> )  | 553.34      | 576.92  | 566.85   |

**Table S4.** The thermodynamic parameters for the adsorption of Pb (II).

| T (K) | $\Delta G$ (kJ mol <sup>-1</sup> ) | $\Delta H$ (kJ mol <sup>-1</sup> ) | $\Delta S$ (J mol <sup>-1</sup> K <sup>-1</sup> ) |
|-------|------------------------------------|------------------------------------|---------------------------------------------------|
| 288   | -1.12                              |                                    |                                                   |
| 298   | -1.49                              | 9.39                               | 36.50                                             |
| 308   | -1.85                              |                                    |                                                   |

**Table S5.** The removal rate and distribution coefficients of  $\beta$ -CDPP for various metal ions.

| Metal ion                            | Pb(II) | Cu(II) | Cd(II) | Zn(II) | Co(II) | Ni(II) |
|--------------------------------------|--------|--------|--------|--------|--------|--------|
| M <sup>n+</sup> removal (%)          | 89.4   | 64.6   | 61.6   | 55.2   | 46.0   | 42.4   |
| K <sub>d</sub> (mL·g <sup>-1</sup> ) | 8.48   | 1.83   | 1.59   | 1.23   | 0.85   | 0.72   |

**Table S6.** The P leaching amount of adsorbent at different pH values.

| pH              | 1 | 2 | 3 | 4 | 5 | 6 |
|-----------------|---|---|---|---|---|---|
| P content (ppm) | 0 | 0 | 0 | 0 | 0 | 0 |
