# Supplementary figures and images for: Phosphate-crosslinked β-cyclodextrin polymer for highly efficient removal of Pb(ii) from acidic wastewater
Source: Royal Society of Chemistry journal article supplement (doi:10.1039/d1nj05925d), 2022-01-01

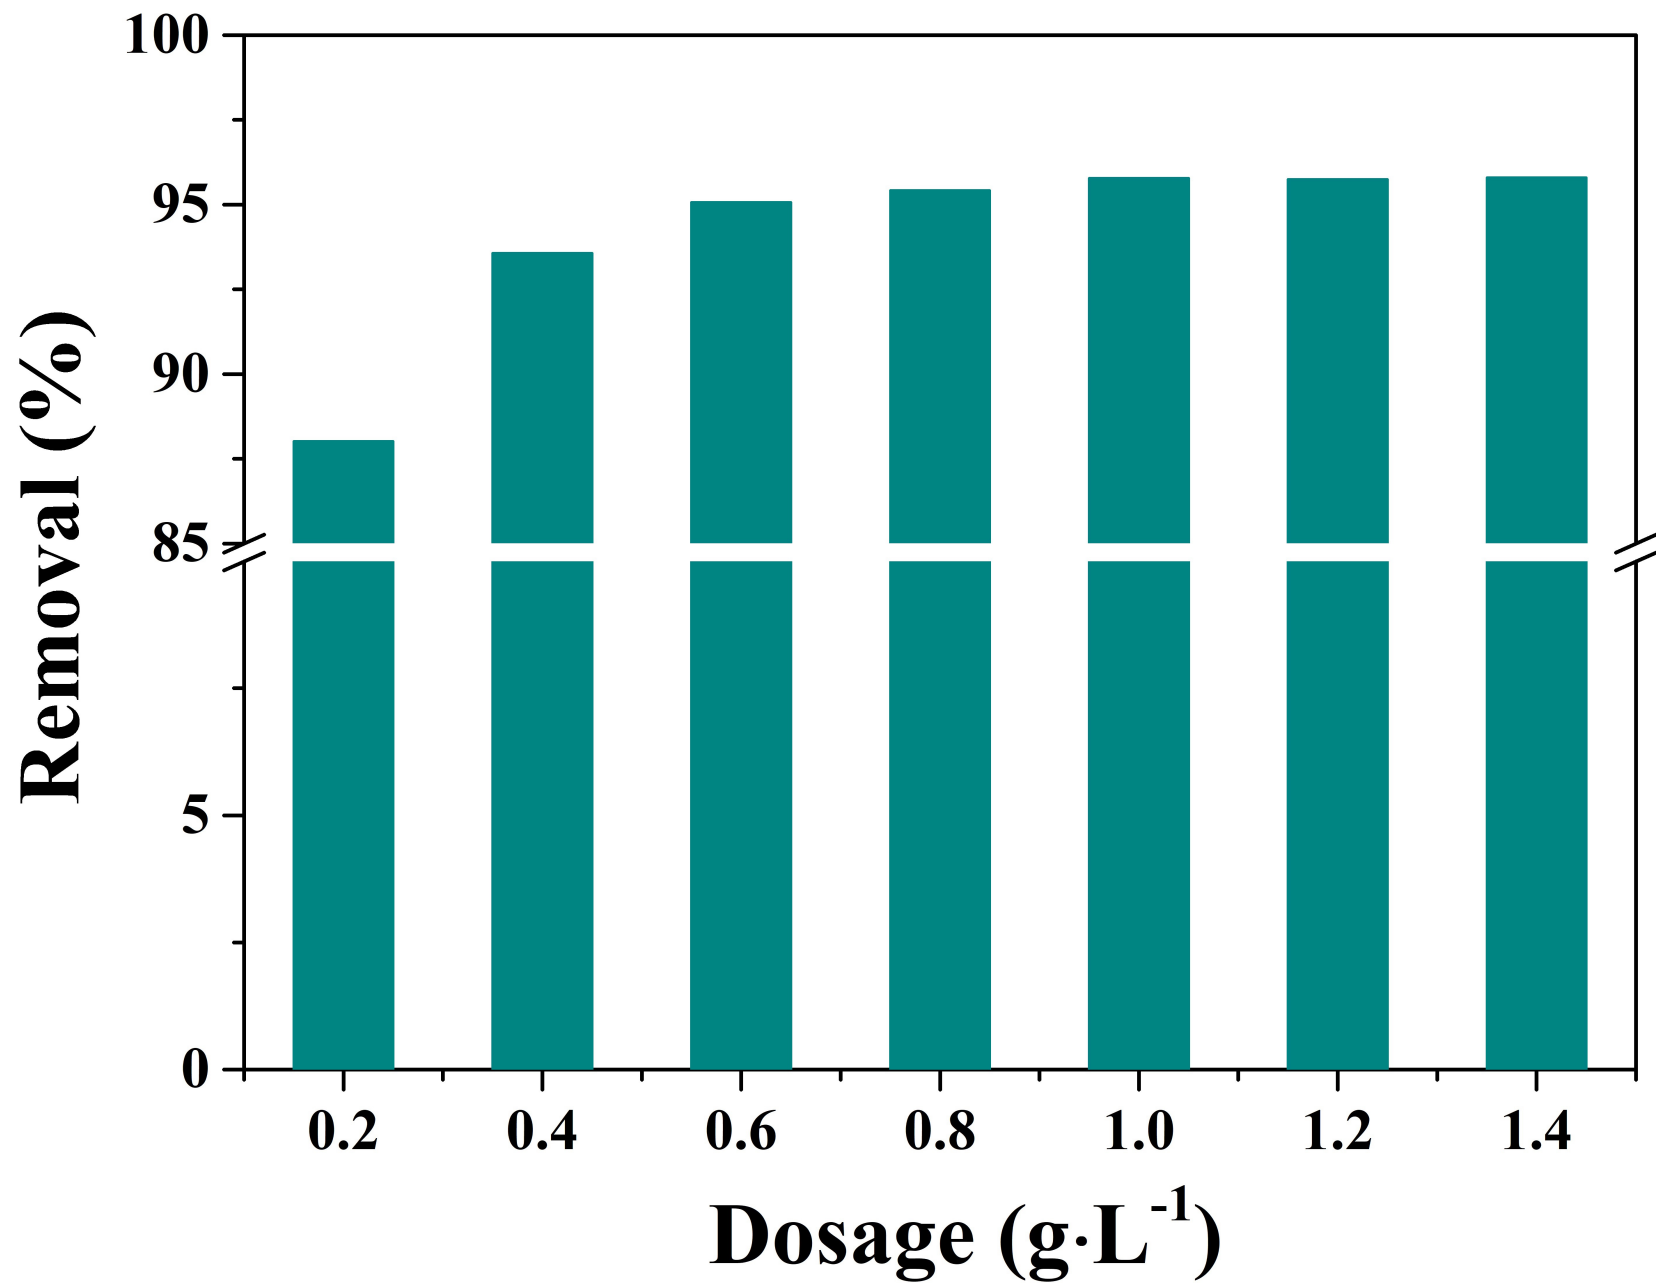

Supplement: d1nj05925d3.pdf [file d1nj05925d3.pdf]

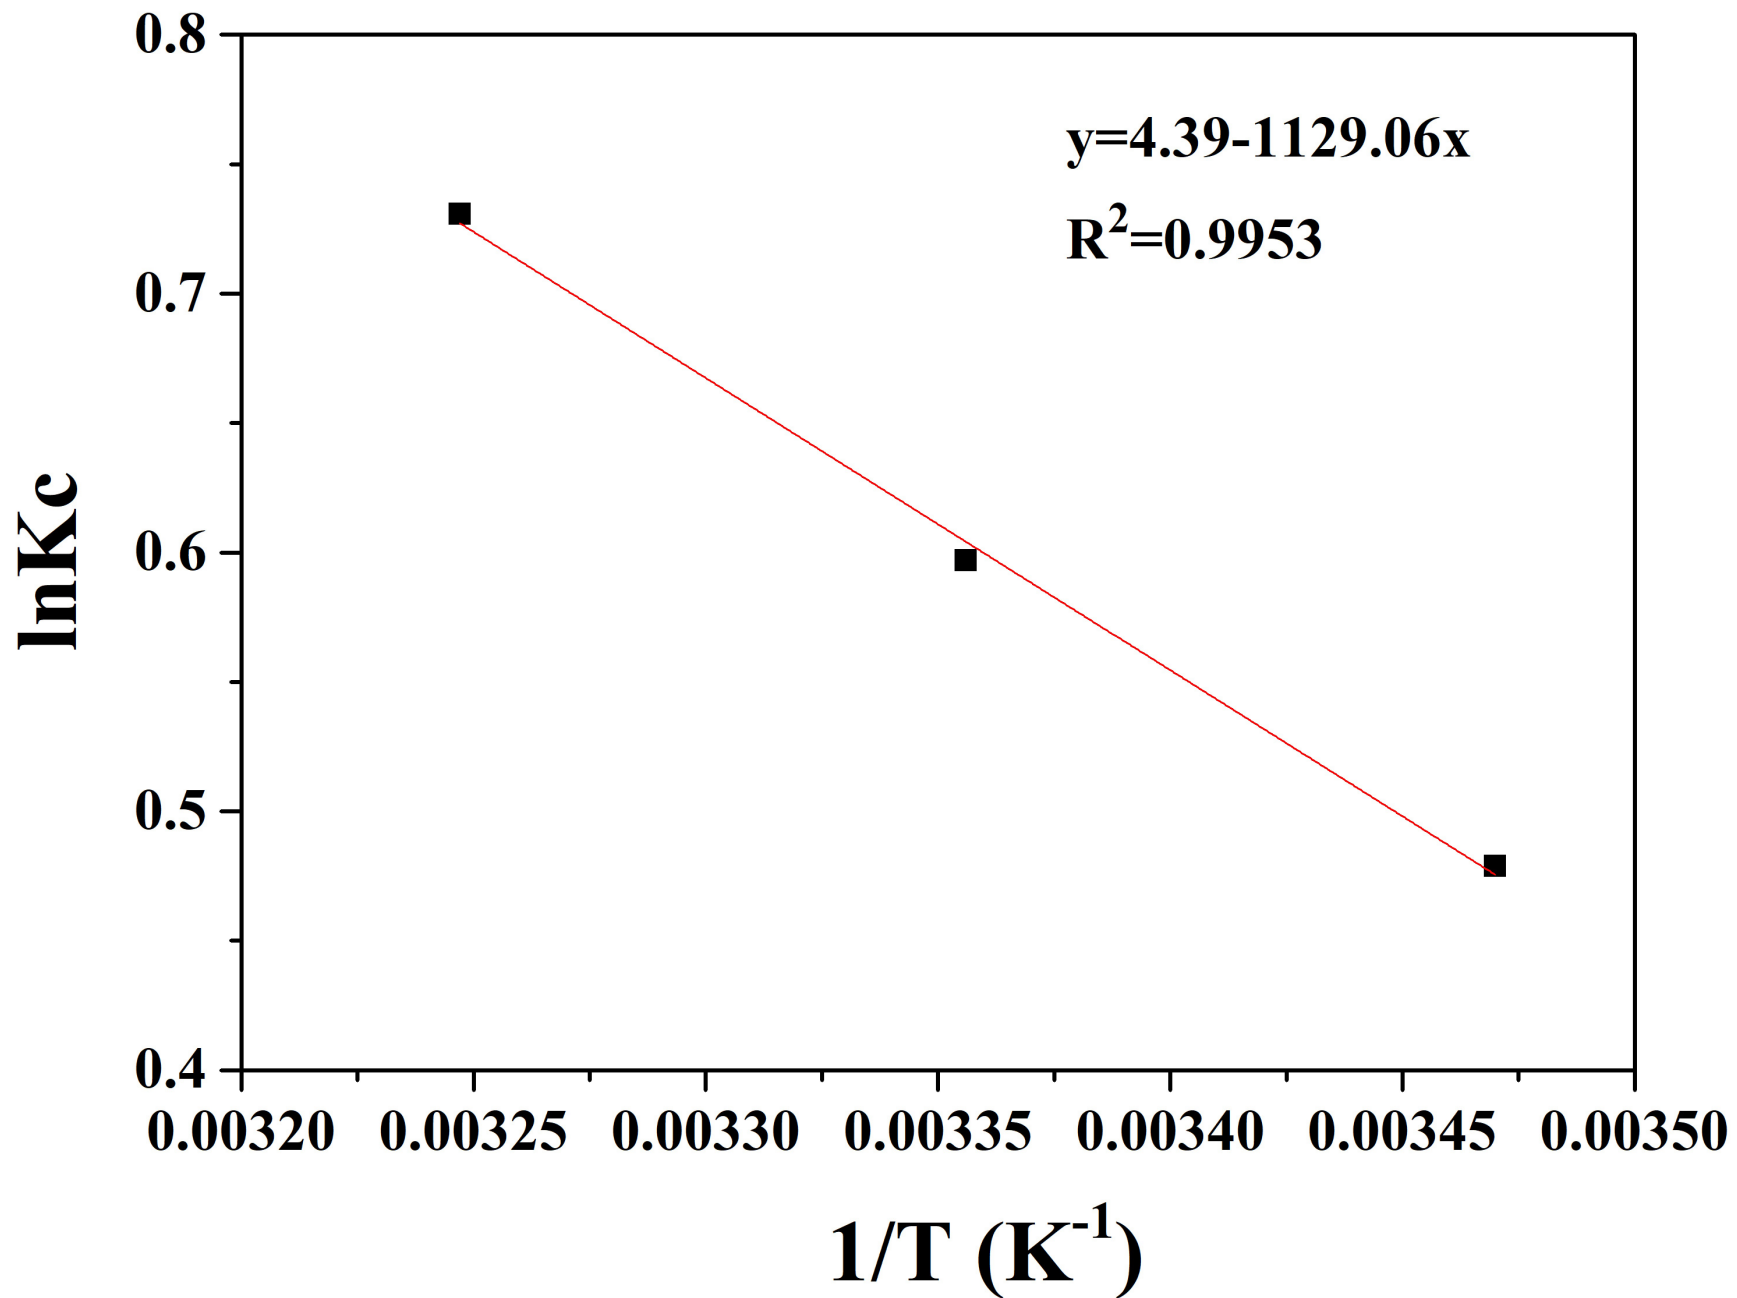

Supplement: d1nj05925d4.pdf [file d1nj05925d4.pdf]
